# Supplementary material
Source: PubMed Central journal article supplement (PMC4822682)
Supplement: NIHMS67279-supplement-1.pdf [file NIHMS67279-supplement-1.pdf]

1 **Supplementary Figure 1:**

2

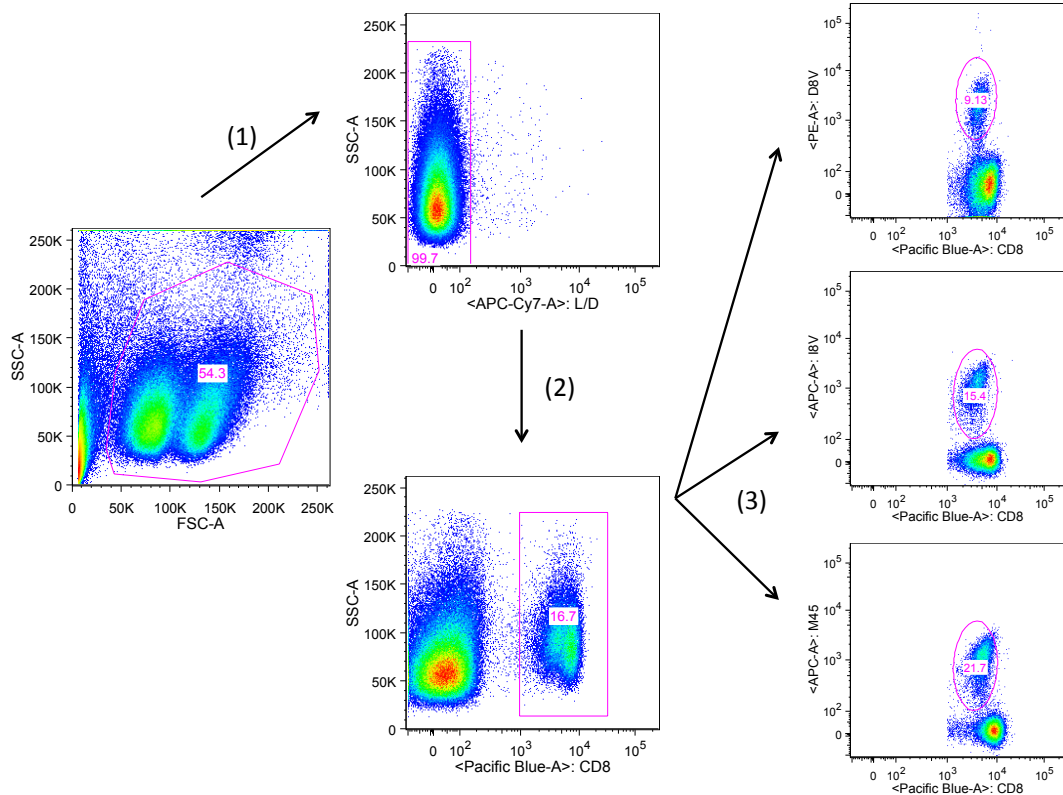

3

4 All flow cytometry was performed on the BD LSR II machine. Events were initially  
5 collected for lymphocytes on FSC/SSC. **(1)** A live dead marker was then used to gate  
6 onto the live lymphocytes. **(2)** A CD8a-PB (eFluro450) stain was then used to gate on  
7 total CD8<sup>+</sup> T cells. Events recorded on each experiment were collected on the CD8<sup>+</sup> T  
8 cells gate (30,000 events). **(3)** Gates could then be applied to count the individual  
9 tetramer-specific populations, with I8V-APC, D8V-PE and M45-APC shown.

10

11

12

13

14

15 **Supplementary Figure 2:**

16

17

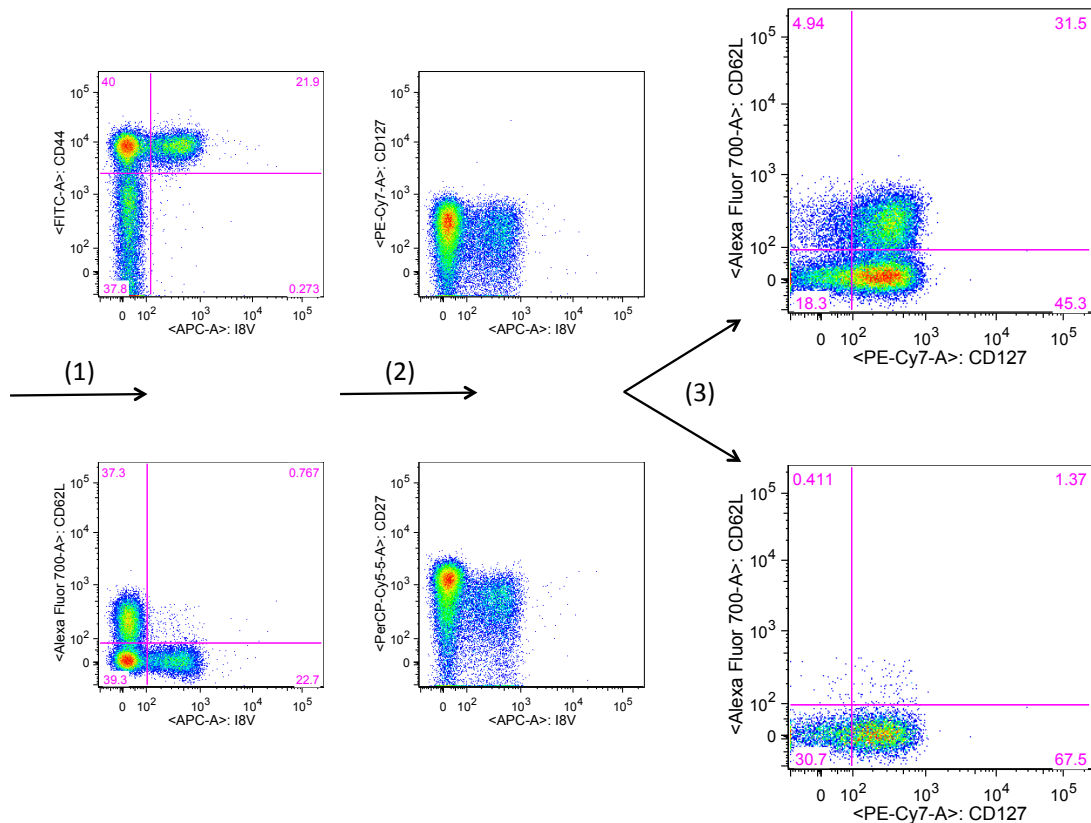

18

19 Starting from total CD8<sup>+</sup> T cells, individual antibody stains could then be assessed on

20 whole CD8<sup>+</sup> T cells and / or tetramer-specific populations of CD8<sup>+</sup> T cells. **(1)** Total

21 CD8<sup>+</sup> T cells are shown with the antibody stain on the y-axis and the applicable

22 tetramer stain (I8V-specific responses following Ad-I8V immunisation in this case)

23 on the x-axis. CD44 and CD62L were analysed as the percentage of total CD8<sup>+</sup> T

24 cells / total tetramer-specific CD8<sup>+</sup> T cells that were CD44 or CD62L positive. **(2)**

25 CD27 and CD127 were analysed according to the geometric mean of total CD8<sup>+</sup> T

26 cells. **(3)** On a plot of total CD8<sup>+</sup> T cells (top right) or tetramer-specific CD8<sup>+</sup> T cells

27 (bottom right – I8V in this case) a comparison of CD127 vs. CD62L could be made

28 and the phenotype of these CD8<sup>+</sup> T cells inferred from that stain.

29 **Supplementary Figure 3:**

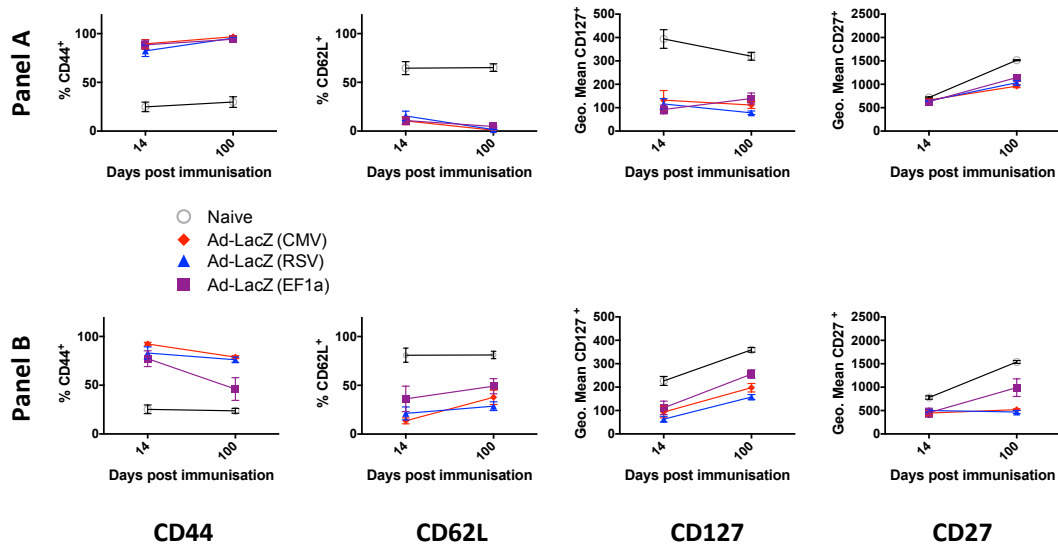

30

31 Phenotypic markers, in blood, for the D8V and I8V-specific responses following  
 32 immunisation with the Ad-LacZ constructs with differing promoters is shown. The  
 33 CD44 and CD62L results are shown as a percentage of the tetramer-positive CD8<sup>+</sup> T  
 34 cells and the CD27 and CD127 as the geometric mean. Panel A represents results for  
 35 the D8V (inflationary) specific responses and panel B the I8V (non-inflationary)  
 36 responses. An early (day 14) and later (day 100) time-point is shown for each  
 37 antibody marker. Groups of 4 mice were used for each vector, with the mean ± SEM  
 38 shown. These results are representative of 3 separate experiments.

39
